# Supplementary material for: A Free-Standing α-MoO3/MXene Composite Anode for High-Performance Lithium Storage
Source: MDPI journal article supplement (doi:10.3390/nano12091422), 2022-04-21
Supplement: s1 [file s1]

Supplementary Materials

# A Free-Standing $\alpha$ -MoO<sub>3</sub>/MXene Composite Anode for High-Performance Lithium Storage

Zihan Guo, Dong Wang, Zhiwei Wang, Yanfang Gao\*, Jinrong Liu\*

School of Chemical Engineering, Inner Mongolia University of Technology, Hohhot, 010051, P.R. China; gzh@imut.edu.cn; wangd0419@163.com; zhiwei2009@126.com

\*Correspondence: yf\_gao@imut.edu.cn; liujr@imut.edu.cn

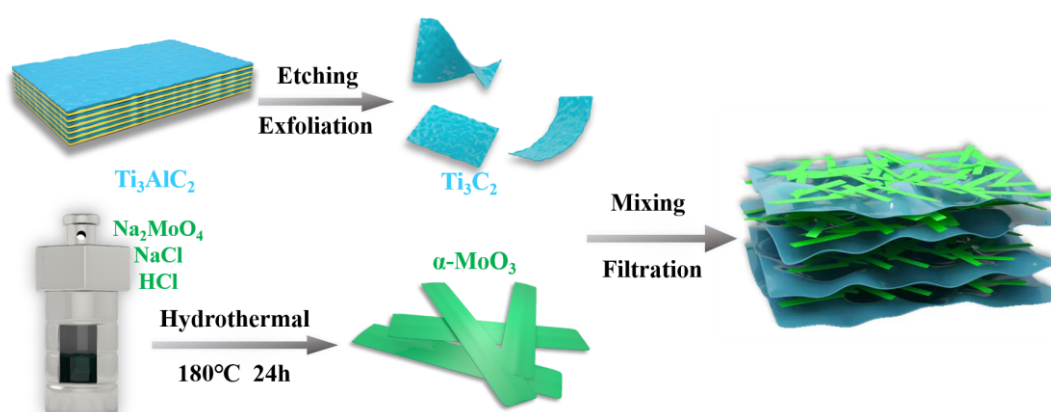

**Figure S1.** Schematic illustration of the preparation process of  $\alpha$ -MoO<sub>3</sub>/MXene.

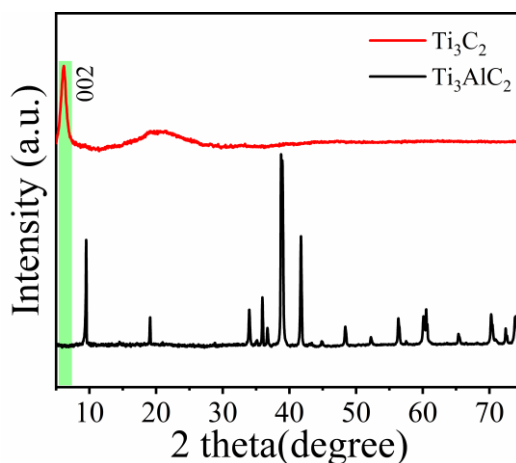

**Figure S2.** XRD diffraction patterns of Ti<sub>3</sub>AlC<sub>2</sub> and Ti<sub>3</sub>C<sub>2</sub>.

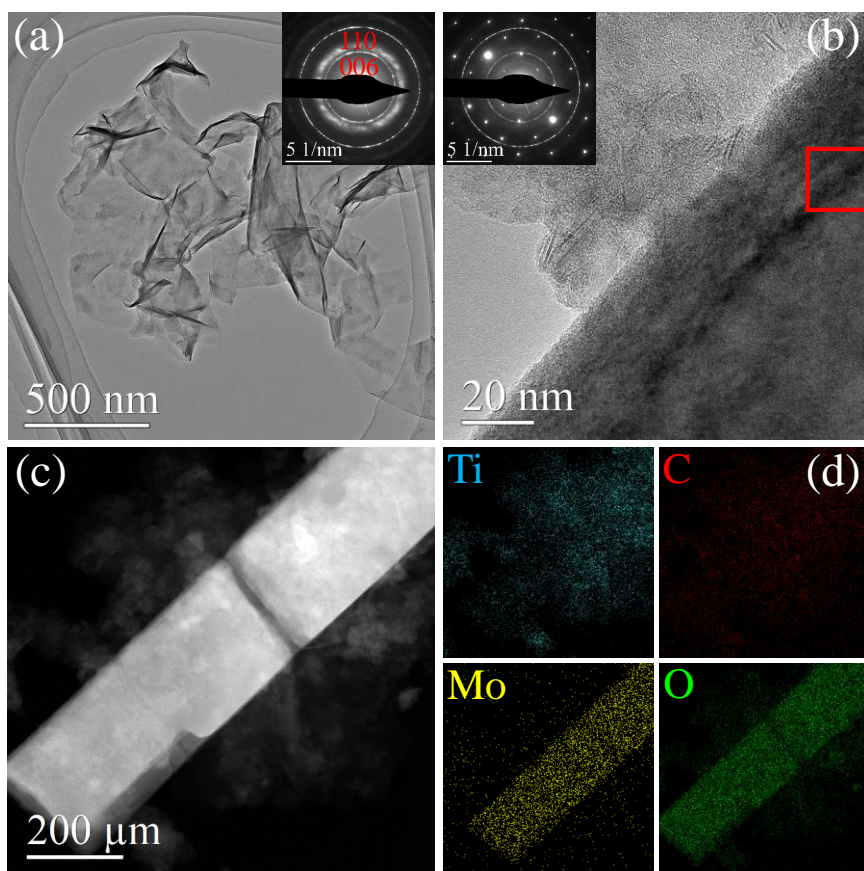

**Figure S3.** (a) TEM image of  $\text{Ti}_3\text{C}_2$ ; the inset shows the SAED pattern. (b) HR-TEM image of  $\alpha\text{-MoO}_3/\text{MXene}$ ; the inset shows the SAED pattern. (c) HAADF image of  $\alpha\text{-MoO}_3/\text{MXene}$ . (d) EDS element images of  $\alpha\text{-MoO}_3/\text{MXene}$ .

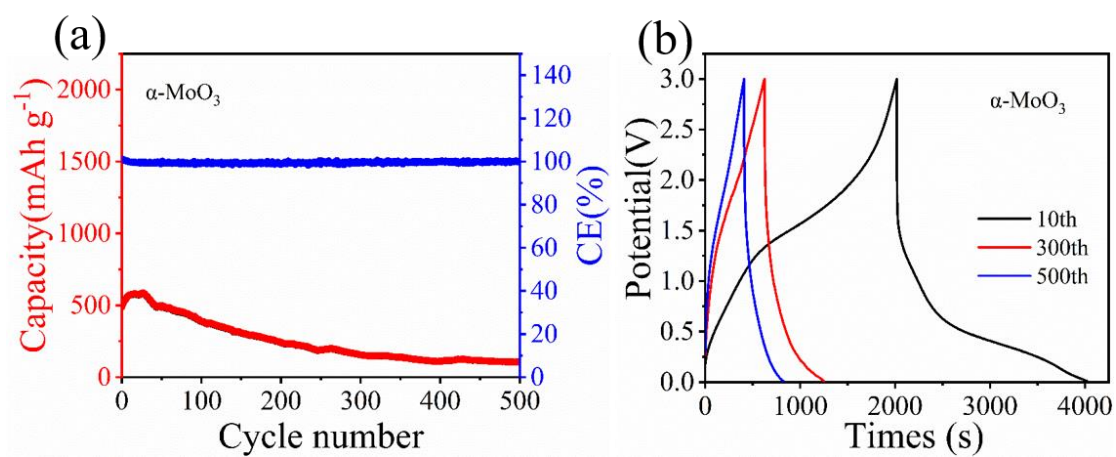

**Figure S4.** (a) Cycling performance of  $\alpha\text{-MoO}_3$  at  $0.5 \text{ A g}^{-1}$ . (b) GCD curves of  $\alpha\text{-MoO}_3$  in different cycles at  $0.5 \text{ A g}^{-1}$ .

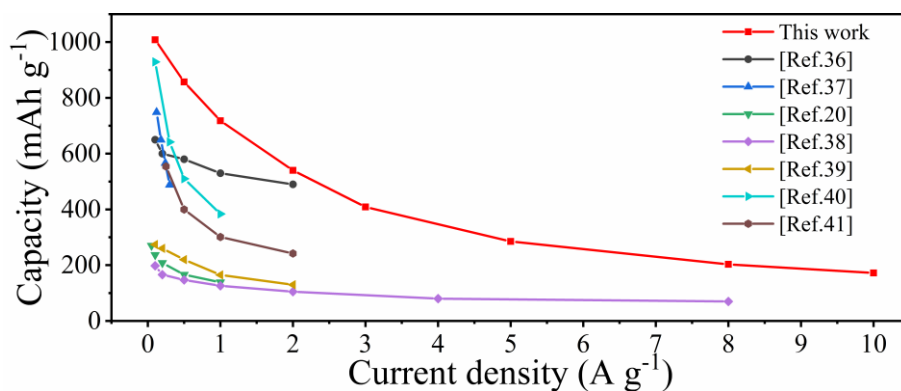

Figure S5. Rate capability at different current densities.

Table S1. Comparison of Li<sup>+</sup> storage performances of our  $\alpha$ -MoO<sub>3</sub>/MXene free-standing electrode with other reported Mo-based materials.

| Materials                                    | Current Density<br>(A g <sup>-1</sup> ) | Discharge Capacity<br>(mAh g <sup>-1</sup> ) | Rate Capability<br>(mAh g <sup>-1</sup> ) | Cycling Stability                             | Ref.      |
|----------------------------------------------|-----------------------------------------|----------------------------------------------|-------------------------------------------|-----------------------------------------------|-----------|
| $\alpha$ -MoO <sub>3</sub> @FeO <sub>x</sub> | 0.1                                     | 650                                          | 490 (2 A g <sup>-1</sup> )                | 1 A g <sup>-1</sup> , 100 cycles,<br>110%     | [36]      |
| MoO <sub>3</sub> @SnS <sub>2</sub>           | 0.12                                    | 749                                          | 488 (0.3 A g <sup>-1</sup> )              | 1 A g <sup>-1</sup> , 100 cycles,<br>53.6%    | [37]      |
| $\alpha$ -MoO <sub>3-x</sub> @MXene          | 0.05                                    | 270                                          | 139 (1 A g <sup>-1</sup> )                | 0.2 A g <sup>-1</sup> , 500 cycles,<br>78.5%  | [20]      |
| MoO <sub>2</sub>                             | 0.1                                     | 198                                          | 70 (8 A g <sup>-1</sup> )                 | 8 A g <sup>-1</sup> , 1500 cycles,<br>123%    | [38]      |
| $\alpha$ -MoO <sub>3-x</sub>                 | 0.1                                     | 274                                          | 88 (5 A g <sup>-1</sup> )                 | 1 A g <sup>-1</sup> , 1000 cycles,<br>30%     | [39]      |
| MoO <sub>3</sub> @MoS <sub>2</sub>           | 0.1                                     | 929                                          | 384 (5 A g <sup>-1</sup> )                | 0.1 A g <sup>-1</sup> , 100 cycles,<br>84.1%  | [40]      |
| TiO <sub>2</sub> -MoO <sub>3</sub>           | 0.25                                    | 554                                          | 242 (2 A g <sup>-1</sup> )                | 0.25 A g <sup>-1</sup> , 100 cycles,<br>71.0% | [41]      |
| $\alpha$ -MoO <sub>3</sub> /MXene            | 0.1                                     | 1008                                         | 172 (10 A g <sup>-1</sup> )               | 0.5 A g <sup>-1</sup> , 500 cycles,<br>112%   | This work |
